# Supplementary material for: Hollow carbon nanospheres dotted with Gd–Fe nanoparticles for magnetic resonance and photoacoustic imaging
Source: Royal Society of Chemistry journal article supplement (doi:10.1039/d1nr02914b), 2021-01-01

Supplementary Information for

**Hollow carbon nanospheres dotted with Gd-Fe nanoparticles for  
magnetic resonance and photoacoustic imaging**

Hui Zhang,<sup>a</sup> Tianze Wu,<sup>a</sup> Yi Chen,<sup>a</sup> Qianqian Zhang,<sup>a</sup> Zhenxia Chen,<sup>a</sup> Yun Ling,<sup>\*a,b</sup> Yu  
Jia,<sup>a</sup> Yongtai Yang,<sup>a</sup> Xiaofeng Liu,<sup>a</sup> and Yaming Zhou<sup>\*a</sup>

<sup>a</sup> Shanghai Key Laboratory of Molecular Catalysis and Innovative Materials,  
Department of Chemistry, Fudan University, Shanghai, 200433, China.

<sup>b</sup> Zhuhai Fudan Innovation Institute, Zhuhai, Guangdong, 519000, China.

\*E-mail: yunling@fudan.edu.cn (Prof. Dr. Ling Y.)

ymzhou@fudan.edu.cn (Prof. Dr. Zhou Y. M.)

**Table S1.** Synthetic parameters for controlling the size and/or thickness of SiO<sub>2</sub>@RF.

| Sample | TEOS<br>(mL) | EtOH<br>(mL) | H <sub>2</sub> O<br>(mL) | Resorcinol<br>(g) | HCHO<br>(mL) | Size<br>(nm) | Thickness<br>(nm) |
|--------|--------------|--------------|--------------------------|-------------------|--------------|--------------|-------------------|
| i      | 0.85         | 50           | 3                        | 0.2               | 0.28         | 100±10       | 10                |
| ii     | 0.85         | 50           | 3                        | 0.05              | 0.07         | 140±10       | 10                |
| iii    | 0.85         | 35           | 3                        | 0.2               | 0.28         | 200±10       | 35                |
| iv     | 0.85         | 50           | 3                        | 0.4               | 0.56         | 220±10       | 50                |
| v      | 0.85         | 25           | 3                        | 0.2               | 0.28         | 320±10       | 70                |

**Table S2.** A summary information of Gd-Fe/HCSs and HCSs (100 nm).

| Sample         | Fe<br>(wt %) | Gd<br>(wt %) | $r_1$<br>( $\text{mM}^{-1}\cdot\text{s}^{-1}$ ) | $r_2$<br>( $\text{mM}^{-1}\cdot\text{s}^{-1}$ ) | BET<br>surface<br>area<br>( $\text{m}^2\cdot\text{g}^{-1}$ ) | $\tau_s$ | $\eta$ |
|----------------|--------------|--------------|-------------------------------------------------|-------------------------------------------------|--------------------------------------------------------------|----------|--------|
| HCSs           | /            | /            | /                                               | /                                               | 597                                                          | 538.15   | 27.03% |
| Gd-<br>Fe/HCSs | 0.597        | 1.638        | 3.78                                            | 257.48                                          | 481                                                          | 415.12   | 35.30% |

**Fig. S1** FT-IR absorption spectra of  $\text{SiO}_2@\text{RF}$ ,  $\{\text{Fe}_6\text{Gd}_6\text{P}_6\}$ ,  $\text{SiO}_2@\text{RF}-\{\text{Fe}_6\text{Gd}_6\text{P}_6\}$ , HCSs, and Gd-Fe/HCSs. (b) The as-made  $\text{SiO}_2@\text{RF}$  composites are homogeneously dispersed in the EtOH solution containing  $\{\text{Fe}_6\text{Gd}_6\text{P}_6\}$ .

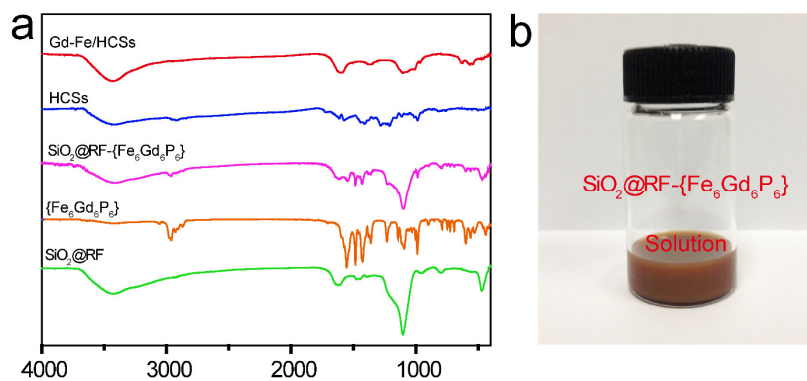



**Fig. S2** (a-b) N<sub>2</sub> sorption isotherm of Gd-Fe/HCSs and the corresponding pore size distribution by BJH. (c-d) N<sub>2</sub> sorption isotherms of hollow carbon spheres (HCSs) and the corresponding pore size distribution by BJH, (e-f) N<sub>2</sub> sorption isotherms of core-shell SiO<sub>2</sub>@carbon nanospheres (SiO<sub>2</sub>@C) and the corresponding pore size distribution by BJH.

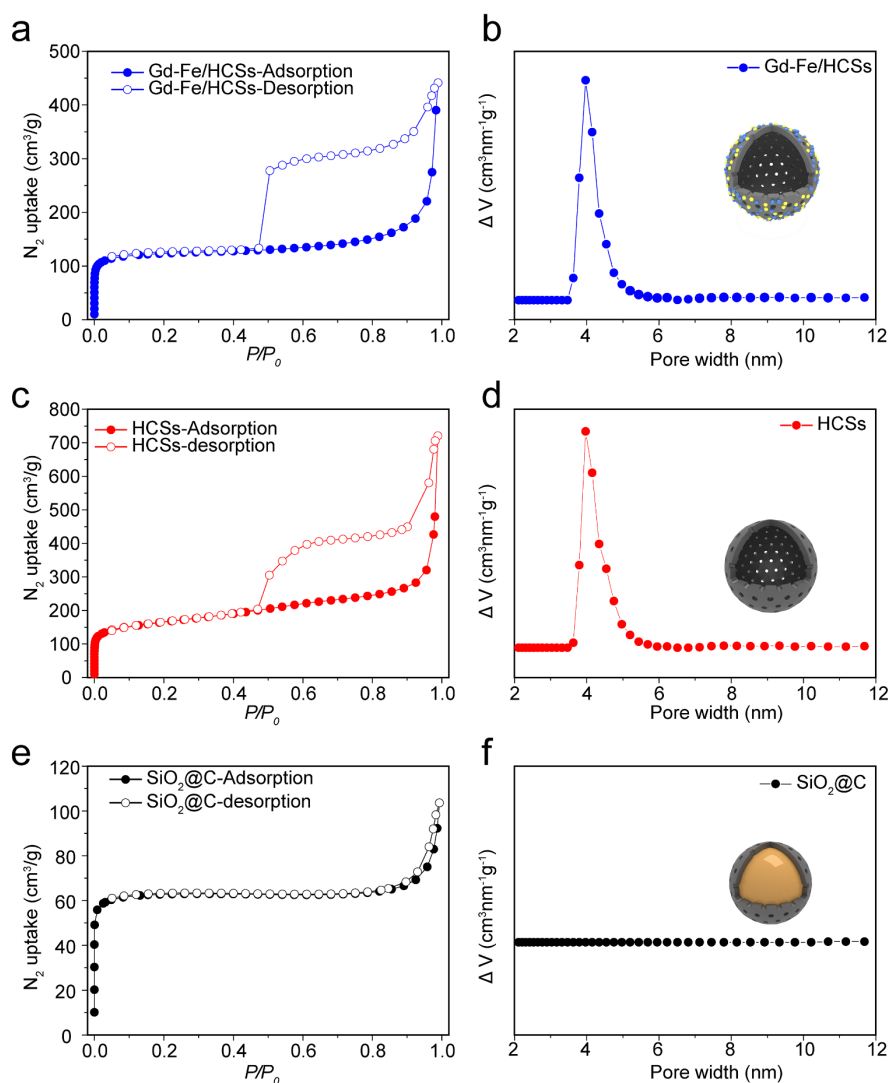

**Fig. S3** Raman spectrum of Gd-Fe/HCSs and HCSs.

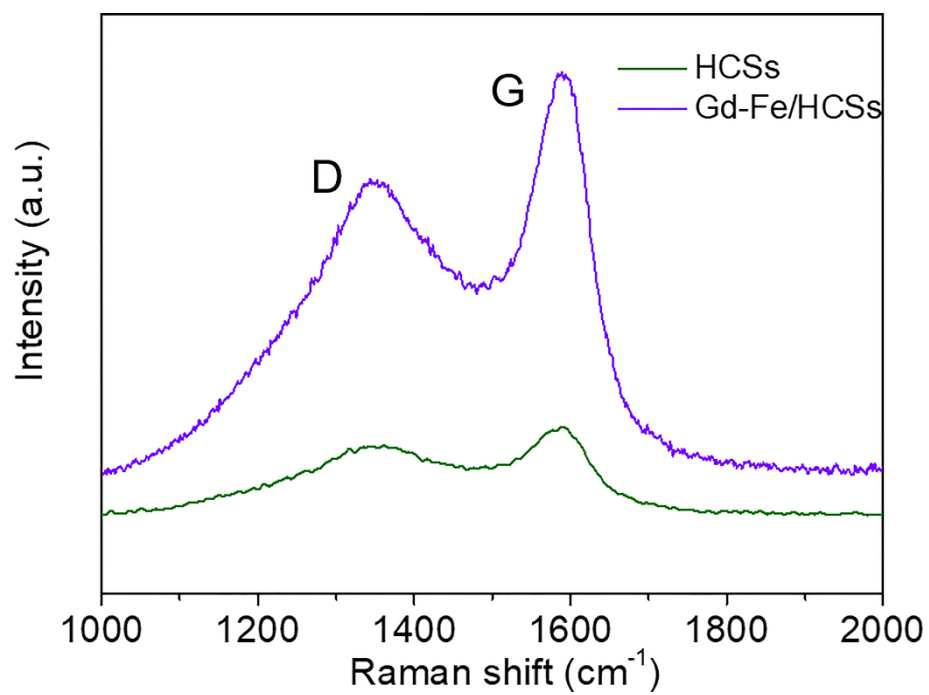

**Fig. S4** (a) High-resolution TEM images. Typical lattice fringes are labeled, assigned to the characteristic lattice plane distance of GdPO<sub>4</sub> (red circle) and  $\gamma$ -Fe<sub>2</sub>O<sub>3</sub> (yellow circle) (Gd-Fe), and (b) the corresponding element analysis result of Gd-Fe/HCSs, which the Gd/Fe molar ratio is measured close to 1: 1.

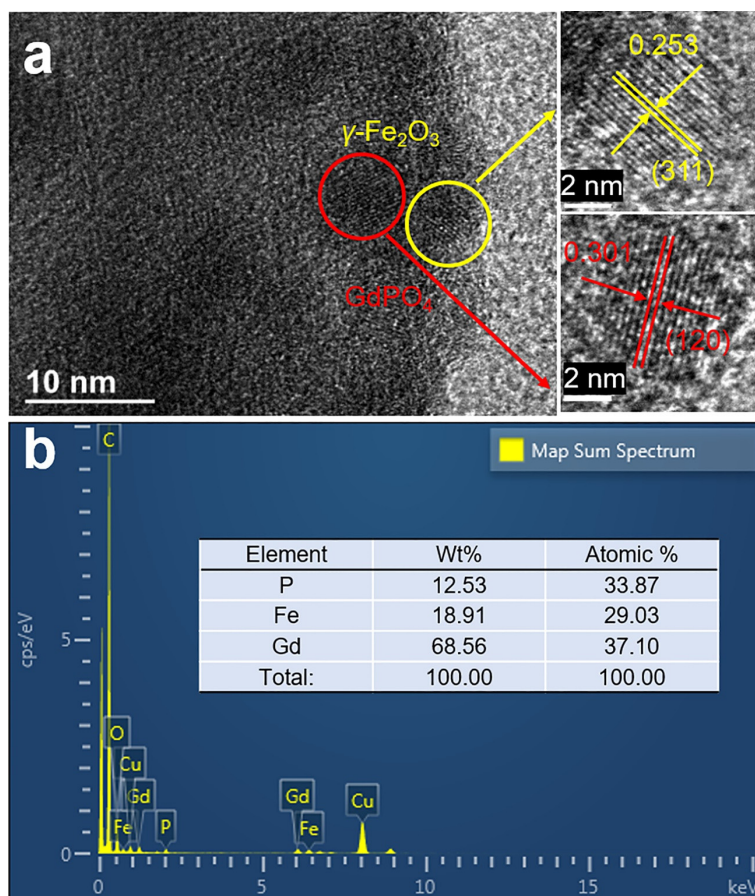

**Fig. S5** PXRD patterns of Gd-Fe/HCSs, GdPO<sub>4</sub> (JCPDS card no. 32-0386), and  $\gamma$ -Fe<sub>2</sub>O<sub>3</sub> (JCPDS card no. 39-1346).

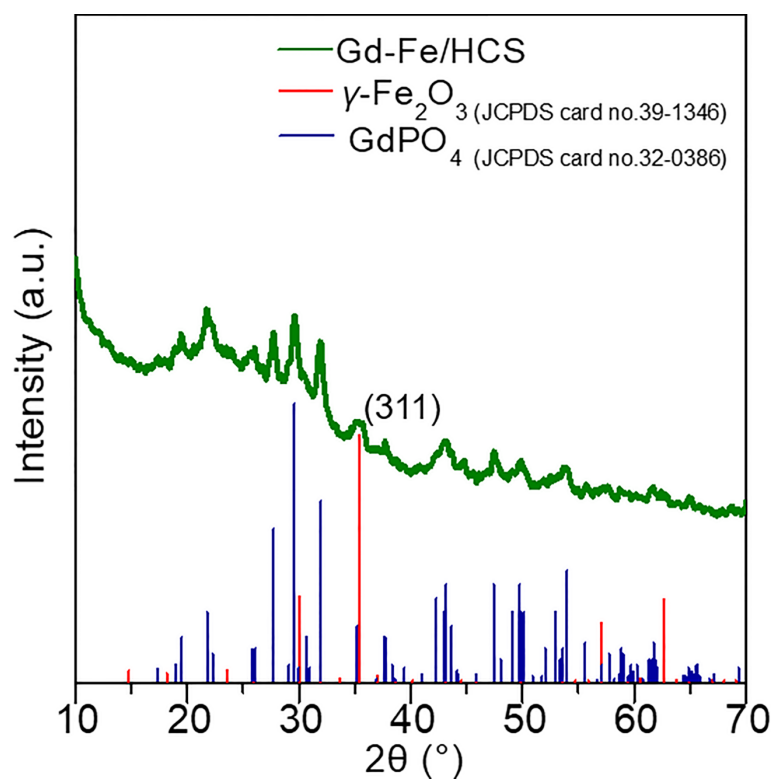

**Fig. S6** (a) TEM image, (b-c) HAADF-STEM images, (d-i) overlay maps of C, O, Gd, Fe and P elements, the corresponding EDS maps of C, O, Fe, Gd, P, and EDS line profiles of the {Gd-Fe}/{SiO<sub>2</sub>@C}.

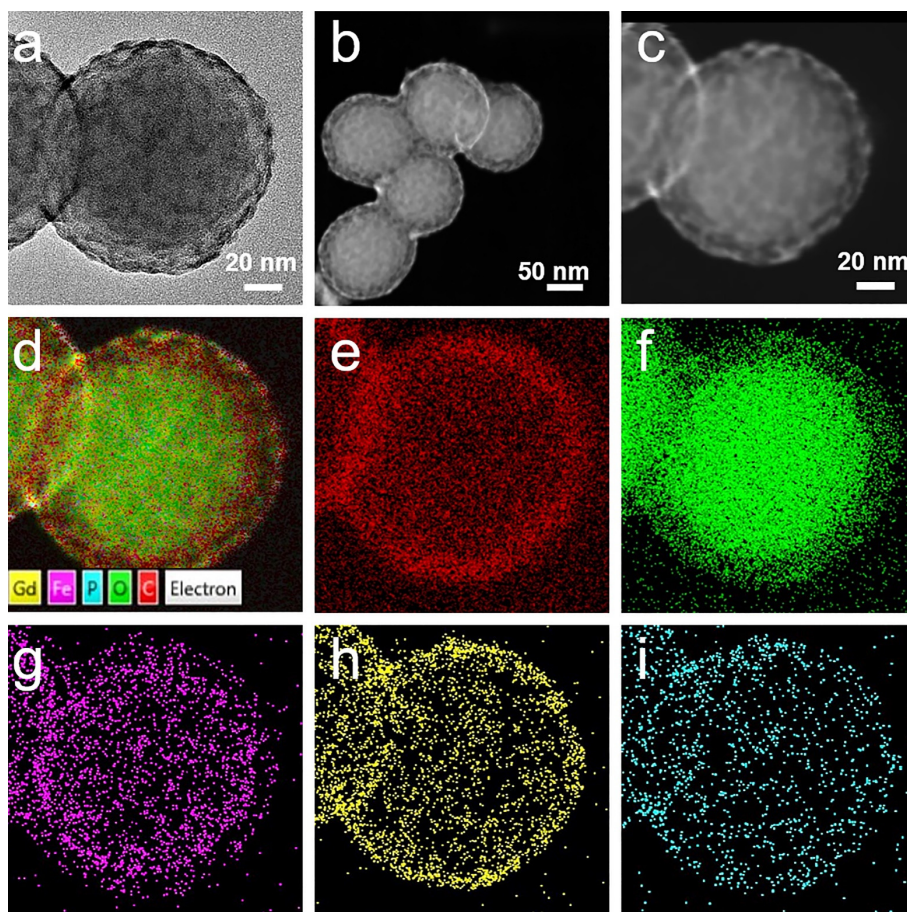

**Fig. S7** (a) TEM image, (b-h) HAADF-STEM images, overlay maps of C, O, Gd, Fe and P elements, the corresponding EDS maps of C, O, Fe, Gd, P, and EDS line profiles of the Gd-Fe/HCSs.

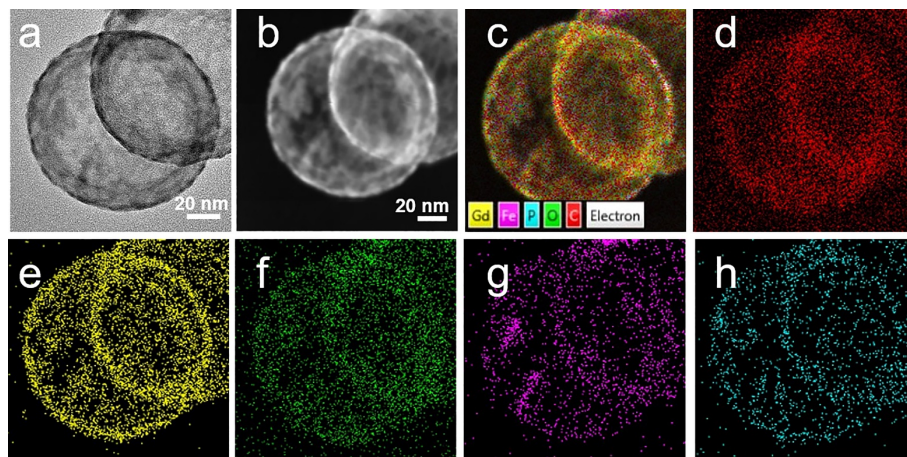



**Fig. S8** A view of the different size and thickness of SiO<sub>2</sub>@RF. (a-i) Shell thickness controlled by regulating the addition of resorcinol and HCHO. The corresponding shell thickness in a-i are 10 nm, 35 nm and 50 nm, respectively. (j-l) Size controlled by regulating the addition of EtOH. The corresponding particle sizes in j-l are 310±10 nm and the shell thickness are 70 nm.

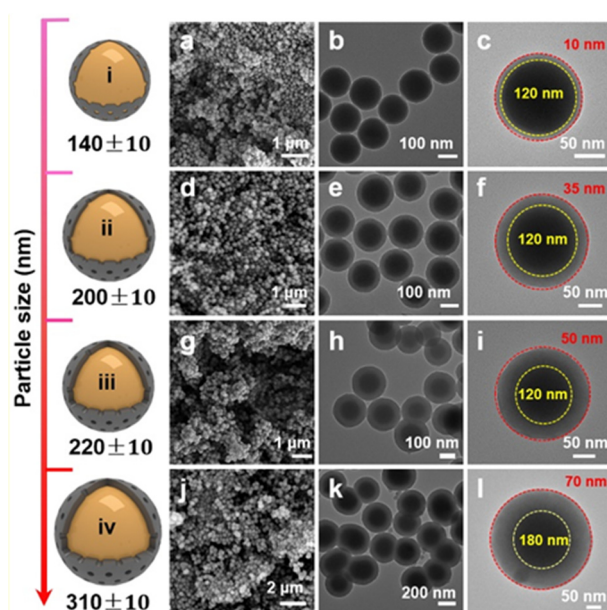

**Fig. S9** TEM images of hollow carbon nanospheres with different metal loading (Gd-Fe/HCSs-n, n: the amount of  $\{\text{Fe}_6\text{Gd}_6\text{P}_6\}$ , n = 0 mg, 1 mg, 3 mg, 6 mg, 12 mg, 18 mg) of 100 nm: (a) HCSs, (b) Gd-Fe/HCSs-1, (c) Gd-Fe/HCSs-3, (d) Gd-Fe/HCSs-6, (e) Gd-Fe/HCSs-12, (f) Gd-Fe/HCSs-18 (100 nm).

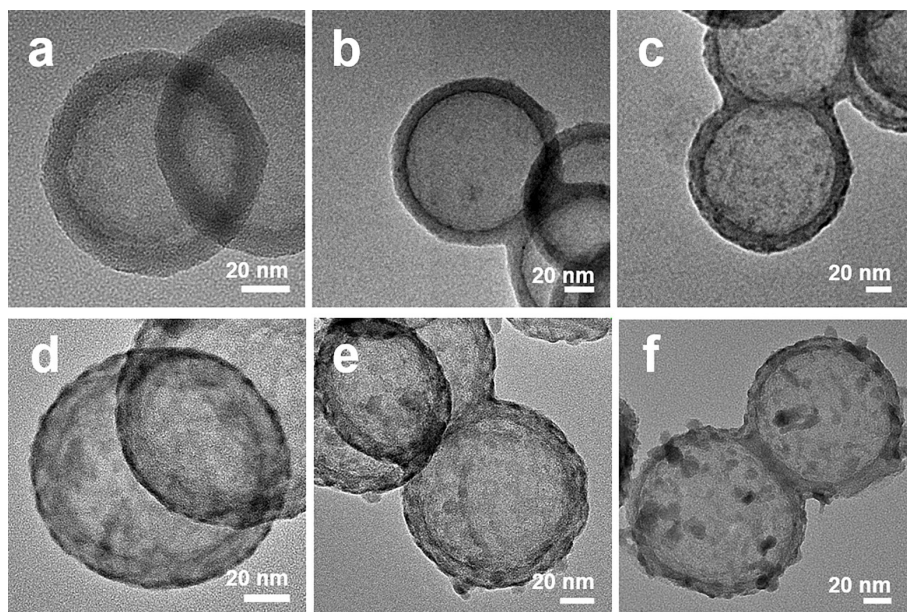



**Fig. S10** TEM images of hollow carbon nanospheres with different metal loading (Gd-Fe/HCSs-n) of 320 nm: (a) HCSs, (b) Gd-Fe/HCSs-1, (c) Gd-Fe/HCSs-3, (d) Gd-Fe/HCSs-6, (e) Gd-Fe/HCSs-12, (f) Gd-Fe/HCSs-18 (320 nm).

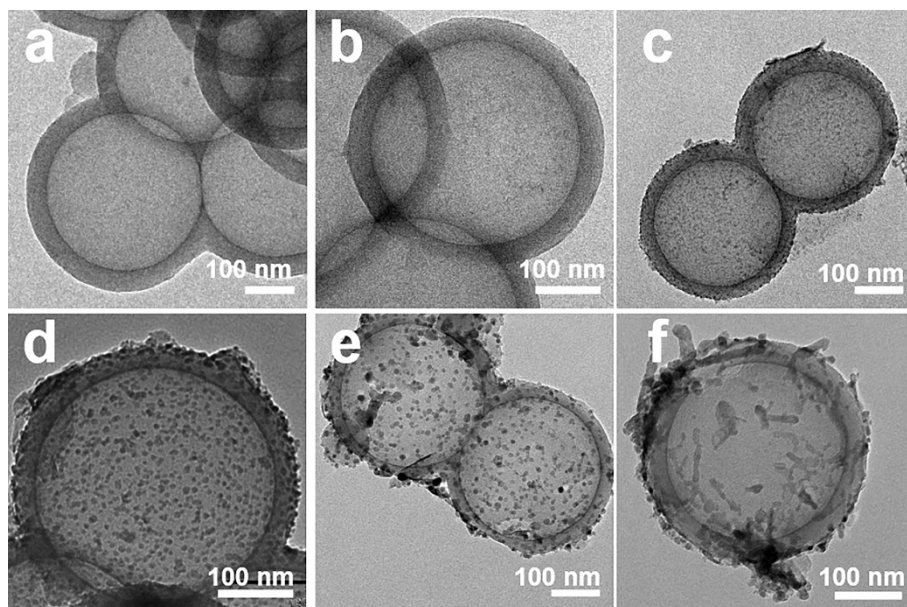

**Fig. S11** PXRD patterns of Gd-Fe/HCSs-n (n= 0 mg, 1 mg, 3 mg, 6 mg, 12 mg, 18 mg) (320 nm).

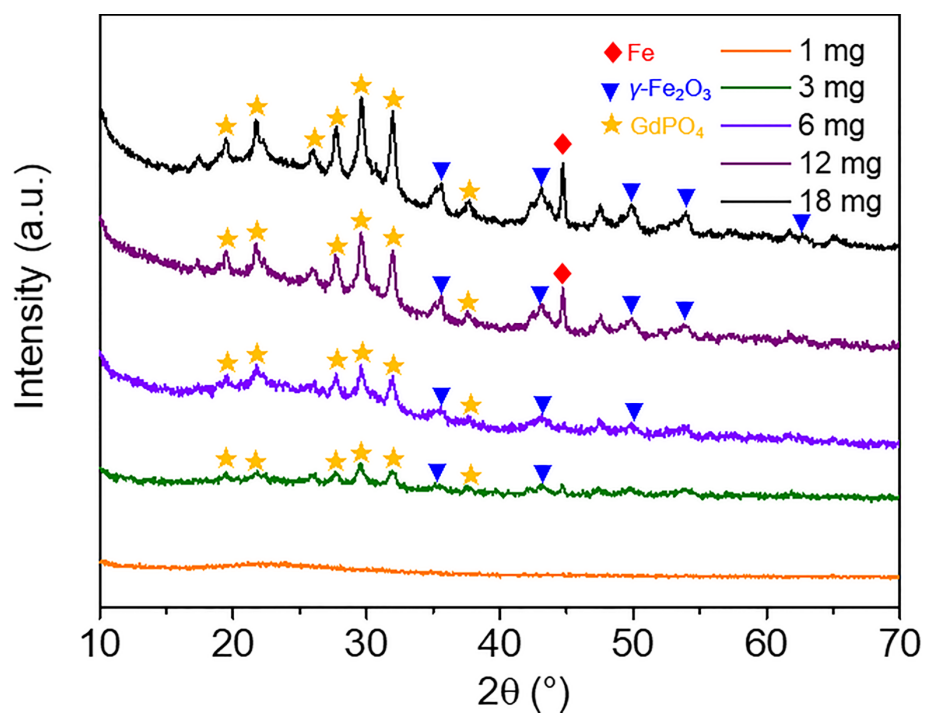

**Fig. S12** Fe 2p XPS spectra of the Gd-Fe/HCSs-6 (I) and Gd-Fe/HCSs-18 (II).

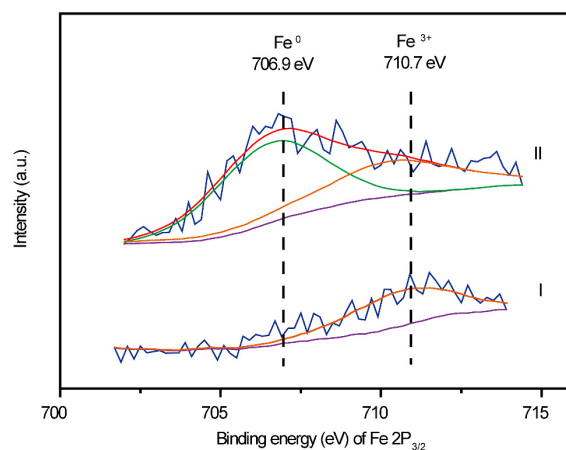

As identified by TEM images (Fig. S10), the structure of hollow carbon spheres can be well retained when the dosage changes from 1 mg to 6 mg. Non-aggregation on the shell of hollow carbon spheres and good dispersion of nanoparticles indicates that GdPO<sub>4</sub> and  $\gamma$ -Fe<sub>2</sub>O<sub>3</sub> nanoparticles are homogeneously dotted in the shell of HCSs. When the dosage increasing to 18 mg, the aggregation of particles can be observed (Fig. S9). The detectable peak at  $2\theta = 44.6^\circ$  could be assigned the characteristic diffraction of the (110) plane of Fe<sup>0</sup> (Fig. S11), which is further identified by XPS (Fig. S12). This Fe<sup>0</sup> indicates the occurrence of a redox reaction between carbon and  $\gamma$ -Fe<sub>2</sub>O<sub>3</sub>.

**Fig. S13** The magnetic hysteresis loop of Gd-Fe/HCSs.

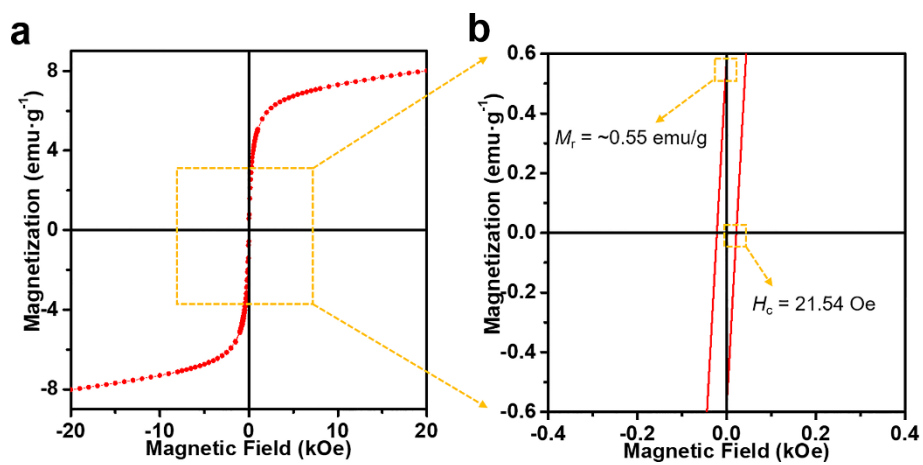

**Fig. S14** Uv-vis-NIR absorbance spectra of HCSs and Gd-Fe/HCSs powders.

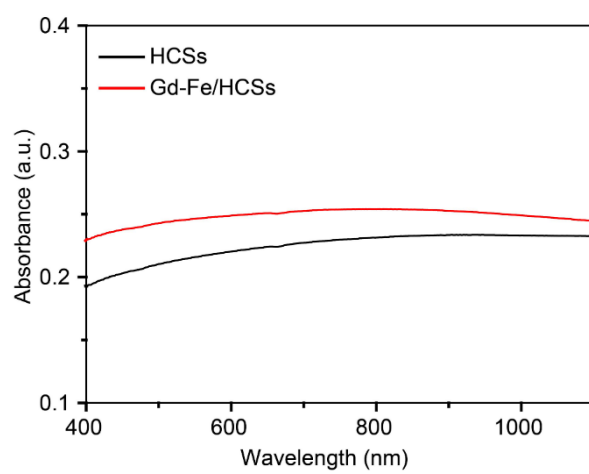

**Fig. S15 (a)** Uv-vis-NIR absorbance spectra of HCSs and Gd-Fe/HCSs (25, 50, and 100  $\mu\text{g}\cdot\text{mL}^{-1}$ ).

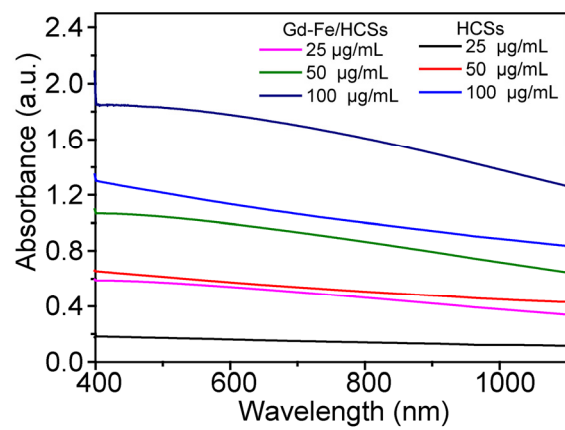

**Fig. S16** The optical photograph of the infrared thermographic camera.

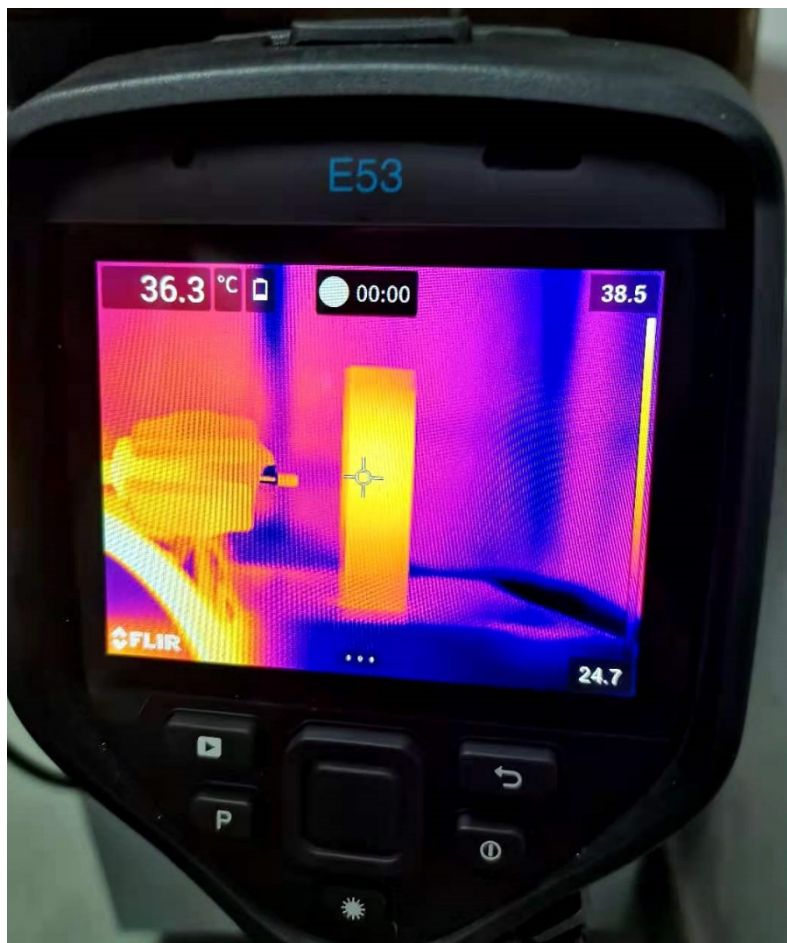

**Fig. S17** Photothermal conversion characterizations of Gd-Fe/HCSs aqueous solution with various concentrations under  $1.0 \text{ W cm}^{-2}$  808 nm laser irradiation for 10 min.

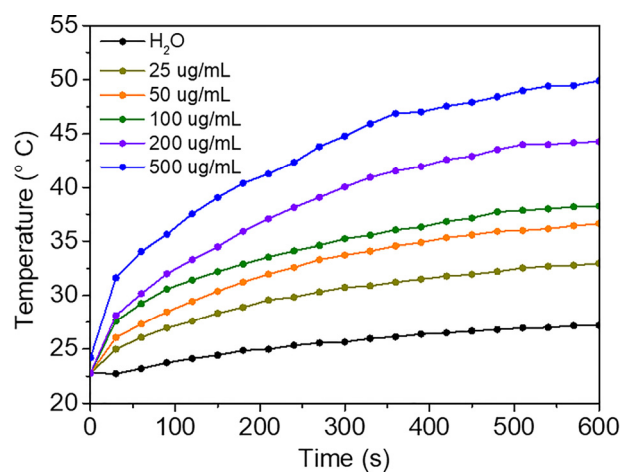



**Fig. S18** Linear time data versus  $-\ln(\theta)$  obtained from the cooling period of HCSs aqueous solution.

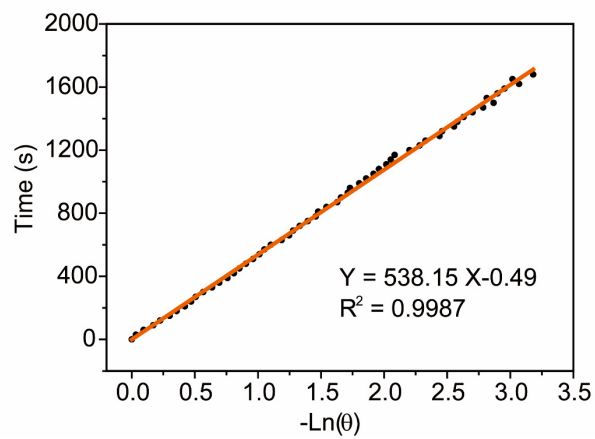

**Fig. S19** The viability of HeLa cells after incubated with Gd-Fe/HCSs at different concentrations.

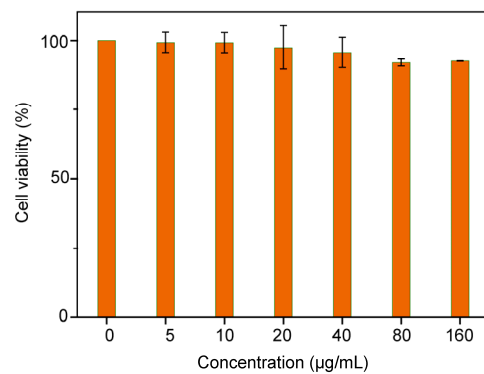

**Fig. S20** The photographic images of PA images in vitro.

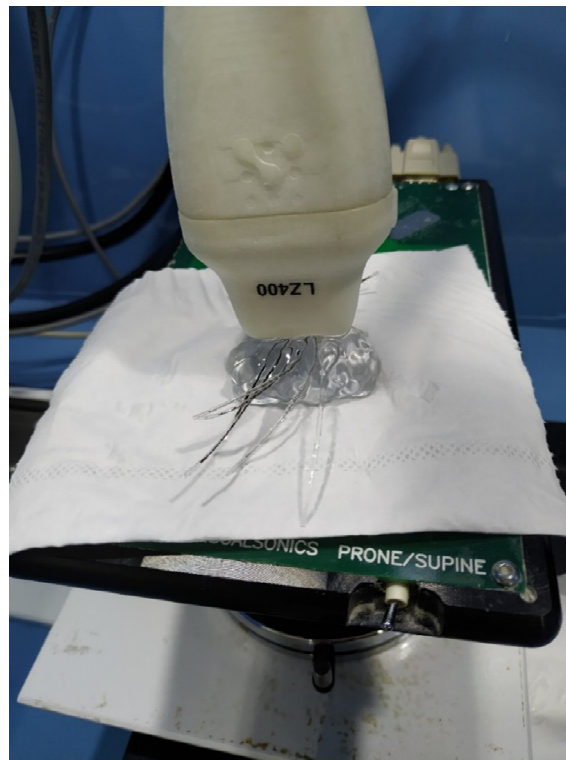

**Fig. S21** (a) In vitro PA signals and (b) the corresponding PA signal intensities of HCSs with different concentrations.

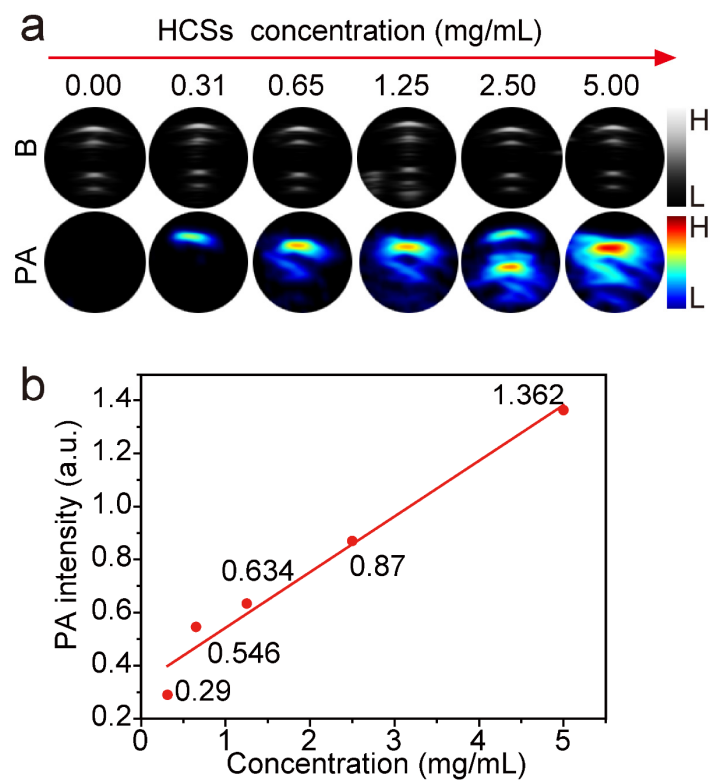

**Fig. S22** (a) The optical images of the HCSs and Gd-Fe/HCSs aqueous solutions. (b) The size distribution of Gd-Fe/HCSs and (c) the zeta-potential of Gd-Fe/HCSs, and (d) the zeta-potential of HCSs.

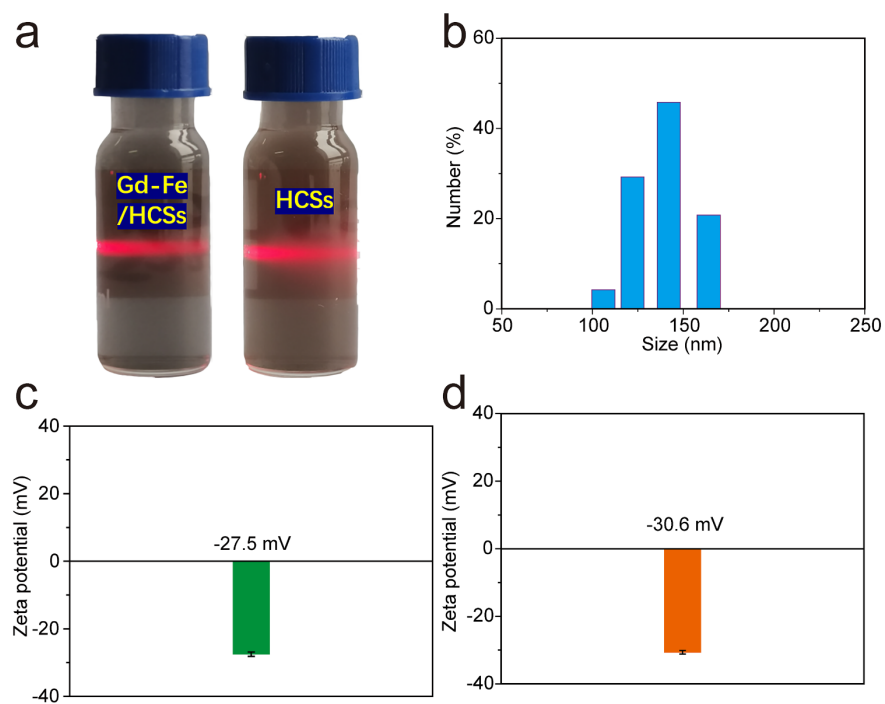

**Fig. S23** (a) In vivo PA images and (b) the corresponding PA intensities of liver at different time points of HCSs (pre, 0.25 h, 1 h, 4 h, and 24 h).

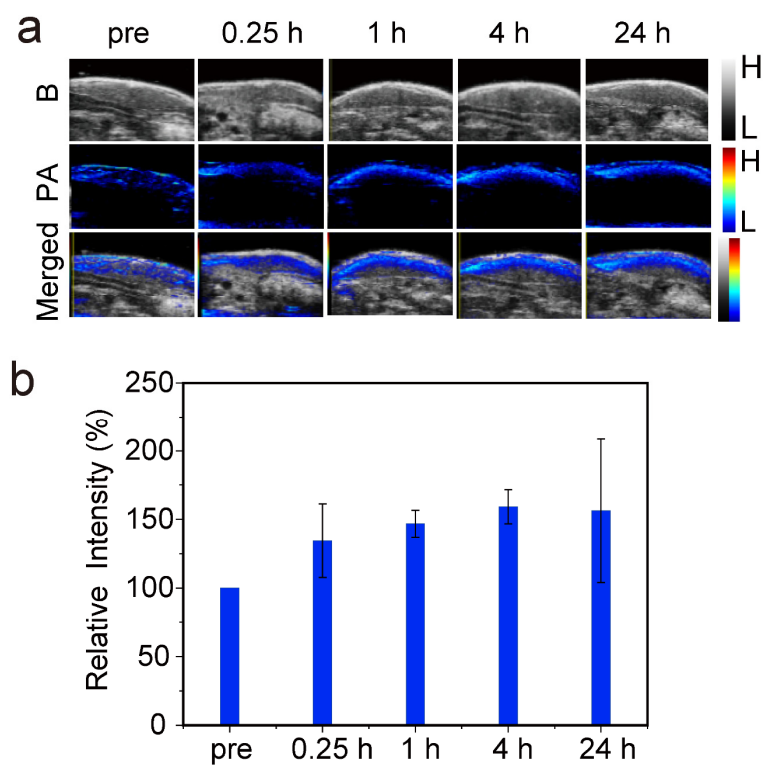

**Fig. S24** Hematoxylin and eosin (H&E) images of major organs collected from mice treated with saline, and Gd-Fe/HCSs.

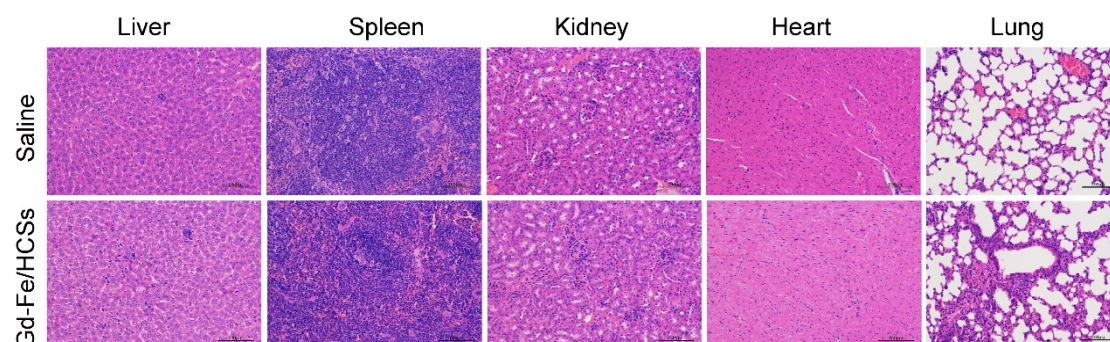

Supplement: d1nr02914b2.pdf [file d1nr02914b2.pdf]
